# Supplementary material for: Directed assembly and characterization of 1D polymers based on [MII(BMA)]2+ node (M = Cu, Mn, Ni and Zn; BMA = N,N-bis (benzimidazol-2-yl-methyl)amine) with linear bridging dicyanamide and terephthalate ligands
Source: Royal Society of Chemistry journal article supplement (doi:10.1039/c003226c), 2010-01-01
Supplement: c003226c.pdf [file c003226c.pdf]

**Supplementary Information for:**

**Directed Assembly and Characterization of 1D Polymers  
Based on  $[M^{II}(\text{BMA})]^{2+}$  Node (M = Cu, Mn, Ni and Zn; BMA  
= N,N-bis (benzimidazol-2-yl-methyl)amine) with Linear  
Bridging dicyanamide and terephthalate Ligands**

**Jing-Yuan Xu,<sup>\*a</sup> Cheng-Zhi Xie,<sup>a</sup> Fei Xue,<sup>a</sup> Lan-Fang Hao,<sup>a</sup> Zhong-Ying Ma,<sup>a</sup> Dai-Zheng Liao,<sup>b</sup> and Shi-Ping Yan<sup>\*b</sup>**

*a) School of Pharmaceutical Sciences, Tianjin Medical University, Tianjin 300070, China*

*b) Department of Chemistry, Nankai University, Tianjin 300071, China*

**Table of content**

- |    |                         |                  |
|----|-------------------------|------------------|
| 1. | Structural information  | Fig. S1          |
| 2. | Fluorescence Properties | Fig. S2, Fig. S3 |

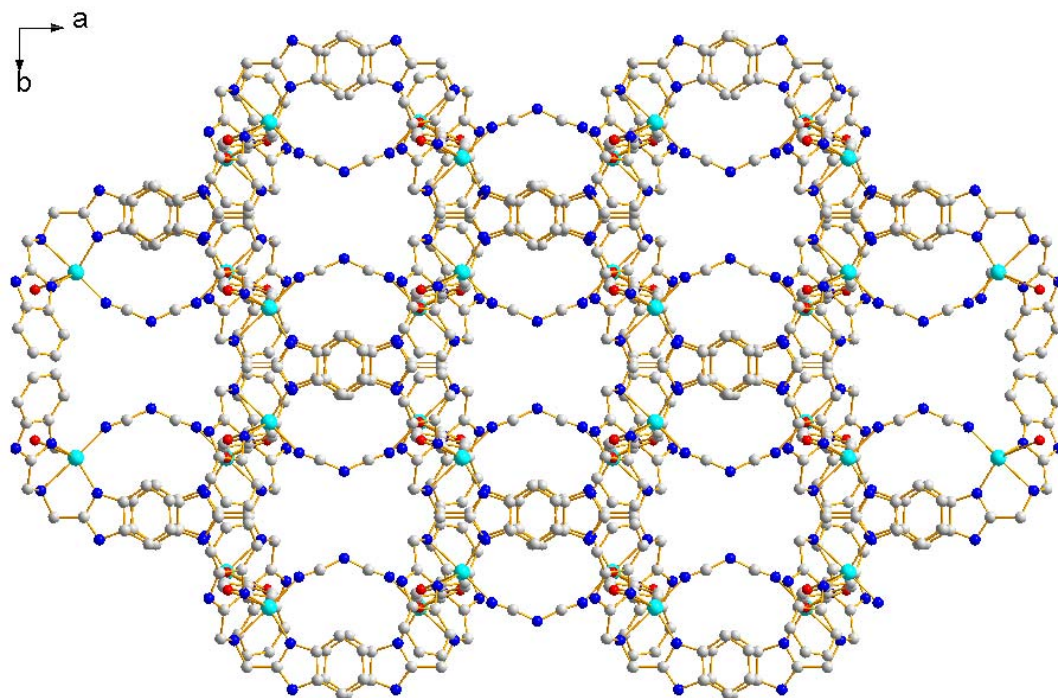

**Figure S1.** Packing plot of complex **4** along the crystallographic [110] showing one-dimensional chain and  $\pi$ - $\pi$  stacking. H atoms, uncoordinated perchlorate anions and methanol molecules were omitted for clarity.

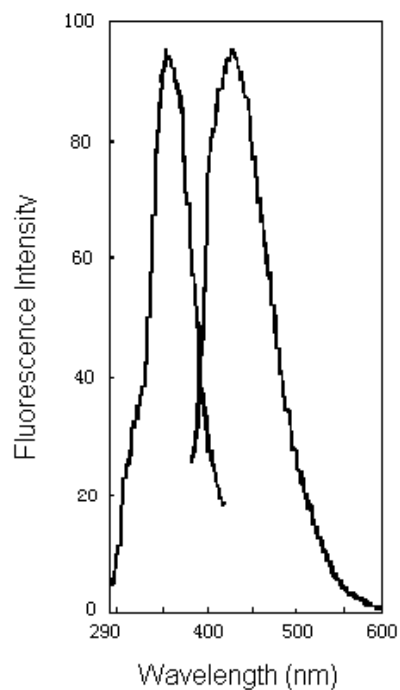

**Figure S2.** Plot of the excitation (left) and emission (right) spectra of **3** in CH<sub>3</sub>OH solution at room temperature.

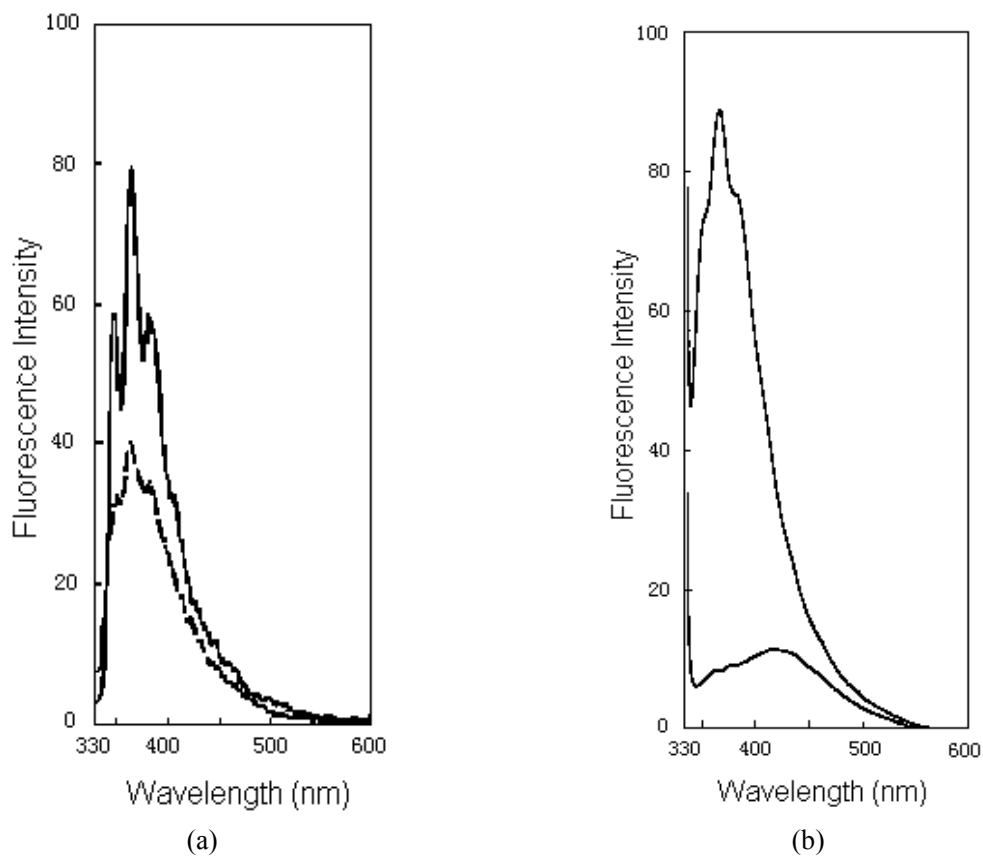

**Figure S3.** The fluorescence spectra of (a) BMA ligand (upper) and **4** (lower) and (b) **4** (upper) and **3** (lower).
